# Supplementary material
Source: PubMed Central journal article supplement (PMC4056648)
Supplement: jn.113.190173_nutrition190173SupplementaryData2.pdf [file jn.113.190173_nutrition190173SupplementaryData2.pdf]

**Supplemental table 1: Adjusted <sup>1,2</sup> semen quality indicators in 155 men (338 semen samples) according to intakes of fish and processed meat**

| Meat intake [range, servings/d]           | N <sup>3</sup> | Total sperm count, <i>million</i> |                                                     | Sperm morphology % <i>normal</i> |                                                     |
|-------------------------------------------|----------------|-----------------------------------|-----------------------------------------------------|----------------------------------|-----------------------------------------------------|
|                                           |                | Original model                    | Adjusted for <sup>2</sup> and processed meat intake | Original model                   | Adjusted for <sup>2</sup> and processed meat intake |
| <b>Total fish intake <sup>4</sup></b>     |                |                                   |                                                     |                                  |                                                     |
| Quartile 1 [0.00-0.12]                    | 40             | 102 (80, 131)                     | 102 (80, 131)                                       | 5.9 (5.0, 6.8)                   | 5.9 (5.0, 6.8)                                      |
| Quartile 2 [0.14-0.20]                    | 35             | 117 (91, 151)                     | 117 (91, 151)                                       | 5.3 (4.4, 6.3)                   | 5.3 (4.4, 6.3)                                      |
| Quartile 3 [0.22-0.32]                    | 43             | 112 (86, 145)                     | 112 (86, 145)                                       | 6.3 (5.2, 7.4)                   | 6.3 (5.2, 7.4)                                      |
| Quartile 4 [0.34-1.02]                    | 37             | 168 (136, 207)                    | 168 (136, 207)                                      | 7.5 (6.5, 8.5)                   | 7.5 (6.5, 8.5)                                      |
| <i>P</i> -trend                           |                | 0.005                             | 0.005                                               | 0.01                             | 0.01                                                |
| <b>Processed meat intake <sup>5</sup></b> |                |                                   |                                                     |                                  |                                                     |
| Quartile 1 [0.00-0.22]                    | 39             | 50.6 (37.8, 67.7)                 | 50.1 (37.5, 67.0)                                   | 7.2 (6.1, 8.3)                   | 7.2 (6.1, 8.3)                                      |
| Quartile 2 [0.24-0.36]                    | 37             | 63.6 (50.0, 80.8)                 | 65.2 (51.4, 82.8)                                   | 6.7 (5.5, 7.9)                   | 6.8 (5.6, 8.0)                                      |
| Quartile 3 [0.38-0.55]                    | 39             | 50.9 (39.4, 65.7)                 | 49.6 (38.4, 64.1)                                   | 5.5 (4.7, 6.4)*                  | 5.3 (4.4, 6.2)                                      |
| Quartile 4 [0.56-2.79]                    | 40             | 37.3 (27.3, 50.8)                 | 37.6 (28.0, 50.5)                                   | 5.5 (4.6, 6.5)*                  | 5.6 (4.7, 6.5)                                      |
| <i>P</i> -trend                           |                | 0.07                              | 0.06                                                | 0.02                             | 0.02                                                |

<sup>1</sup> Values are mean (95% CIs). \* Different from men in the lowest category, P <0.05.

<sup>2</sup> Adjusted for age, total energy intake, body mass index, race, smoking status, abstinence interval, previous infertility diagnosis, and dietary patterns.

<sup>3</sup> Number of participants per category of meat intake

<sup>4</sup> Total fish defined as the sum of dark meat fish (including canned tuna fish and other dark meat fish such as salmon and bluefish), white meat fish (including breaded fish cakes and other white meat fish such as cod, haddock, and halibut), and shellfish (including shrimp, lobster, scallops, and clams as a main dish).

<sup>5</sup> Includes hamburgers, hot dogs, bacon, and other processed meats (e.g. salami, bologna, etc.)
