# Supplementary material
Source: PubMed Central journal article supplement (PMC4056648)
Supplement: jn.113.190173_nutrition190173SupplementaryData3.pdf [file jn.113.190173_nutrition190173SupplementaryData3.pdf]

**Supplemental table 2: Crude <sup>1,2</sup> semen quality indicators in 155 men (338 semen samples) according to intake of different meat types from the Environment and Reproductive Health Study**

| Meat intake [range, servings/d]          | N <sup>3</sup> | Total sperm count | Sperm concentration | Progressive motility | Sperm morphology | Ejaculate volume |
|------------------------------------------|----------------|-------------------|---------------------|----------------------|------------------|------------------|
|                                          |                | <i>million</i>    | <i>million/mL</i>   | <i>% motile</i>      | <i>% normal</i>  | <i>mL</i>        |
| <b>Total meat</b>                        |                |                   |                     |                      |                  |                  |
| Quartile 1 [0.00-0.96]                   | 38             | 130 (100-169)     | 57.3 (44.2-74.3)    | 27.8 (22.3-33.3)     | 6.8 (5.5-8.2)    | 2.6 (2.2-3.1)    |
| Quartile 2 [0.97-1.38]                   | 39             | 132 (104-168)     | 49.9 (38.9-64.0)    | 25.6 (20.5-30.7)     | 6.3 (5.3-7.3)    | 2.9 (2.6-3.3)    |
| Quartile 3 [1.40-1.80]                   | 39             | 103 (79-134)      | 42.8 (32.2-56.9)    | 23.2 (18.8-27.7)     | 5.7 (4.8-6.7)    | 2.7 (2.3-3.1)    |
| Quartile 4 [1.81-4.97]                   | 39             | 116 (85-159)      | 47.7 (34.8-65.3)    | 28.7 (24.0-33.3)     | 6.1 (5.1-7.1)    | 2.7 (2.3-3.2)    |
| <i>P</i> -trend                          |                | 0.53              | 0.44                | 0.72                 | 0.43             | 0.99             |
| <b>Processed red meat <sup>4</sup></b>   |                |                   |                     |                      |                  |                  |
| Quartile 1 [0.00-0.22]                   | 39             | 118 (91-155)      | 51.2 (39.2-66.9)    | 26.5 (22.1-30.8)     | 7.2 (6.1-8.4)    | 2.7 (2.3-3.1)    |
| Quartile 2 [0.24-0.36]                   | 37             | 154 (123-193)     | 61.9 (49.3-77.7)    | 31.2 (24.9-37.6)     | 6.6 (5.4-7.8)    | 2.8 (2.4-3.1)    |
| Quartile 3 [0.38-0.55]                   | 39             | 133 (105-169)     | 50.4 (38.5-65.9)    | 24.2 (20.3-28.1)     | 5.5 (4.6-6.3)    | 2.9 (2.5-3.3)    |
| Quartile 4 [0.56-2.79]                   | 40             | 86 (65-114)       | 37.0 (27.6-49.6)    | 23.6 (19.0-28.3)     | 5.6 (4.8-6.5)    | 2.6 (2.2-3.0)    |
| <i>P</i> -trend                          |                | 0.06              | 0.05                | 0.19                 | 0.02             | 0.87             |
| <b>Unprocessed red meat <sup>5</sup></b> |                |                   |                     |                      |                  |                  |
| Quartile 1 [0.00-0.12]                   | 44             | 116 (92-148)      | 48.3 (37.7-61.8)    | 24.0 (20.2-27.8)     | 6.1 (5.1-7.2)    | 2.7 (2.4-3.1)    |
| Quartile 2 [0.16-0.22]                   | 27             | 141 (107-184)     | 56.6 (42.2-76.0)    | 30.0 (22.1-37.9)     | 6.8 (5.5-8.2)    | 2.9 (2.3-3.4)    |
| Quartile 3 [0.24-0.30]                   | 42             | 127 (102-159)     | 54.5 (42.6-69.7)    | 28.2 (24.2-32.2)     | 6.3 (5.5-7.1)    | 2.6 (2.2-2.9)    |
| Quartile 4 [0.36-1.29]                   | 42             | 105 (76-144)      | 41.1 (29.8-56.7)    | 24.7 (20.0-29.4)     | 5.9 (4.9-6.9)    | 2.8 (2.4-3.3)    |
| <i>P</i> -trend                          |                | 0.49              | 0.35                | 0.93                 | 0.64             | 0.72             |
| <b>Organ meat <sup>6</sup></b>           |                |                   |                     |                      |                  |                  |
| None                                     | 125            | 118 (102-136)     | 49.1 (42.2-57.1)    | 25.8 (23.2-28.5)     | 5.9 (5.4-6.5)    | 2.7 (2.5-2.9)    |
| Any [0.02-0.94]                          | 30             | 128 (94-174)      | 49.6 (37.2-66.2)    | 28.5 (23.4-33.5)     | 7.6 (6.4-8.8)    | 2.9 (2.4-3.3)    |
| <i>P</i> -value (comparing two groups)   |                | 0.64              | 0.95                | 0.36                 | 0.01             | 0.60             |
| <b>Poultry <sup>7</sup></b>              |                |                   |                     |                      |                  |                  |
| Quartile 1 [0.00-0.18]                   | 42             | 106 (82-137)      | 47.6 (36.8-61.6)    | 26.8 (21.9-31.7)     | 7.1 (6.0-8.2)    | 2.6 (2.2-3.0)    |
| Quartile 2 [0.22-0.36]                   | 37             | 146 (115-185)     | 51.3 (38.9-67.7)    | 25.5 (21.3-29.6)     | 5.9 (5.0-6.8)    | 3.1 (2.7-3.5)    |
| Quartile 3 [0.42-0.59]                   | 36             | 111 (82-150)      | 46.6 (33.9-64.1)    | 25.6 (20.0-31.2)     | 5.7 (4.6-6.7)    | 2.7 (2.3-3.1)    |
| Quartile 4 [0.65-2.82]                   | 40             | 122 (95-158)      | 51.5 (40.1-66.1)    | 27.3 (23.2-31.4)     | 6.1 (5.1-7.1)    | 2.7 (2.3-3.0)    |

|                 |      |      |      |      |      |
|-----------------|------|------|------|------|------|
| <i>P</i> -trend | 0.52 | 0.66 | 0.76 | 0.46 | 0.72 |
|-----------------|------|------|------|------|------|

<sup>1</sup> Values are mean (95% CIs). \* Different from men in the lowest category,  $P < 0.05$ .

<sup>2</sup> Adjusted for total energy intake

<sup>3</sup> Number of participants per category of meat intake

<sup>4</sup> Includes hamburgers, hot dogs, bacon, and other processed meats (e.g. salami, bologna, etc.)

<sup>5</sup> Includes beef, pork, and ham consumed as mixed dish or main dish

<sup>6</sup> Includes liver and chicken liver

<sup>7</sup> Includes chicken or turkey cooked with or without skin, as main dish, sandwich, or frozen dinner
