# Supplementary material
Source: PubMed Central journal article supplement (PMC4056648)
Supplement: jn.113.190173_nutrition190173SupplementaryData4.pdf [file jn.113.190173_nutrition190173SupplementaryData4.pdf]

**Supplemental table 3: Crude <sup>1,2</sup> semen quality indicators in 155 men (338 semen samples) according to intake of different fish types from the Environment and Reproductive Health Study**

| Meat intake [range, servings/d] | N <sup>3</sup> | Total sperm count | Sperm concentration | Progressive motility | Sperm morphology | Ejaculate volume |
|---------------------------------|----------------|-------------------|---------------------|----------------------|------------------|------------------|
|                                 |                | <i>million</i>    | <i>million/mL</i>   | <i>% motile</i>      | <i>% normal</i>  | <i>mL</i>        |
| Total fish <sup>4</sup>         |                |                   |                     |                      |                  |                  |
| Quartile 1 [0.00-0.12]          | 40             | 119 (93-154)      | 49.9 (38.3-65.0)    | 26.3 (20.6-32.0)     | 6.1 (5.1-7.1)    | 2.7 (2.3-3.1)    |
| Quartile 2 [0.14-0.20]          | 35             | 117 (89-154)      | 48.5 (35.7-65.9)    | 26.8 (21.7-31.9)     | 5.4 (4.4-6.3)    | 2.8 (2.3-3.3)    |
| Quartile 3 [0.22-0.32]          | 43             | 114 (88-148)      | 44.7 (34.4-58.0)    | 25.1 (21.4-28.8)     | 6.3 (5.2-7.4)    | 2.8 (2.5-3.2)    |
| Quartile 4 [0.34-1.02]          | 37             | 131 (103-167)     | 55.2 (43.3-70.4)    | 27.4 (23.2-31.6)     | 7.1 (6.2-8.0)    | 2.6 (2.3-3.0)    |
| <i>P</i> -trend                 |                | 0.58              | 0.59                | 0.83                 | 0.07             | 0.72             |
| Dark meat fish <sup>5</sup>     |                |                   |                     |                      |                  |                  |
| Quartile 1 [0.00-0.02]          | 34             | 107 (80-145)      | 47.9 (35.2-65.0)    | 24.3 (18.6-30.0)     | 6.1 (5.1-7.0)    | 2.5 (2.1-2.9)    |
| Quartile 2 [0.04-0.08]          | 38             | 120 (90-160)      | 44.5 (33.5-59.3)    | 26.0 (20.9-31.1)     | 5.6 (4.6-6.7)    | 3.1 (2.7-3.5)    |
| Quartile 3 [0.10-0.14]          | 42             | 125 (101-155)     | 55.8 (44.6-69.9)    | 27.4 (23.4-31.4)     | 6.3 (5.4-7.2)    | 2.5 (2.1-2.9)    |
| Quartile 4 [0.16-0.86]          | 41             | 126 (99-159)      | 48.5 (37.3-63.0)    | 27.3 (23.3-31.2)     | 6.9 (5.7-8.0)    | 2.9 (2.5-3.2)    |
| <i>P</i> -trend                 |                | 0.44              | 0.66                | 0.39                 | 0.15             | 0.70             |
| White fish <sup>6</sup>         |                |                   |                     |                      |                  |                  |
| Tertile 1 [0.00-0.02]           | 50             | 122 (97-154)      | 52.4 (40.8-67.3)    | 26.5 (21.7-31.4)     | 5.3 (4.6-6.1)    | 2.6 (2.3-3.0)    |
| Tertile 2 [0.04-0.08]           | 55             | 128 (105-156)     | 48.7 (39.4-60.3)    | 26.8 (23.0-30.6)     | 6.7 (5.7-7.7)    | 2.9 (2.6-3.3)    |
| Tertile 3 [0.10-0.51]           | 50             | 110 (86-139)      | 46.6 (36.7-59.3)    | 25.6 (22.2-29.0)     | 6.6 (5.8-7.4)    | 2.6 (2.3-2.9)    |
| <i>P</i> -trend                 |                | 0.54              | 0.51                | 0.76                 | 0.02             | 0.92             |
| Shellfish <sup>7</sup>          |                |                   |                     |                      |                  |                  |
| Half 1 [0.00-0.02]              | 78             | 116 (97-139)      | 47.4 (39.1-57.4)    | 26.5 (22.7-30.2)     | 6.2 (5.4-6.9)    | 2.8 (2.5-3.1)    |
| Half 2 [0.08-0.43]              | 77             | 124 (103-149)     | 51.2 (42.2-62.0)    | 26.2 (23.3-29.1)     | 6.3 (5.6-7.1)    | 2.7 (2.4-3.0)    |
| <i>P</i> -trend                 |                | 0.64              | 0.58                | 0.92                 | 0.81             | 0.77             |

<sup>1</sup> Values are mean (95% CIs). \* Different from men in the lowest category, P <0.05.

<sup>2</sup> Adjusted for total energy intake

<sup>3</sup> Number of participants per category of meat intake

<sup>4</sup> Total fish defined as the sum of dark meat fish (including canned tuna fish and other dark meat fish such as salmon and bluefish), white meat fish (including breaded fish cakes and other white meat fish such as cod, haddock, and halibut), and shellfish (including shrimp, lobster, scallops, and clams as a main dish).

<sup>5</sup> Includes canned tuna fish and other dark meat fish (e.g. salmon, bluefish, etc.)

<sup>6</sup> Includes breaded fish cakes and other white meat fish (e.g. cod, haddock, halibut)

<sup>7</sup> Includes shrimp, lobster, scallops, clams as a main dish
